# Supplementary material for: Impact of soil properties on the soil methane flux response to biochar addition: a meta-analysis
Source: Royal Society of Chemistry journal article supplement (doi:10.1039/c8em00278a), 2018-01-01
Supplement: c8em00278a1.pdf [file c8em00278a1.pdf]

**Supporting Information to:**

**Impact of land use and soil properties on soil methane flux response to biochar addition: a meta-analysis**

Weiwei Cong<sup>1</sup>, Jun Meng<sup>1</sup>, Samantha C. Ying<sup>2</sup>

<sup>1</sup>*College of Agronomy, Shenyang Agricultural University, Shenyang, 110161, China*

<sup>2</sup>*Department of Environmental Science, University of California Riverside, Riverside, CA 92507, USA*

**Contents of this file**

1. Figures S1. Kernel density plots of observed values for overall soil, biochar and management variables.
2. Tables S1-S20
3. Datasets S1. The original data extracted from the individual studies for meta-analysis

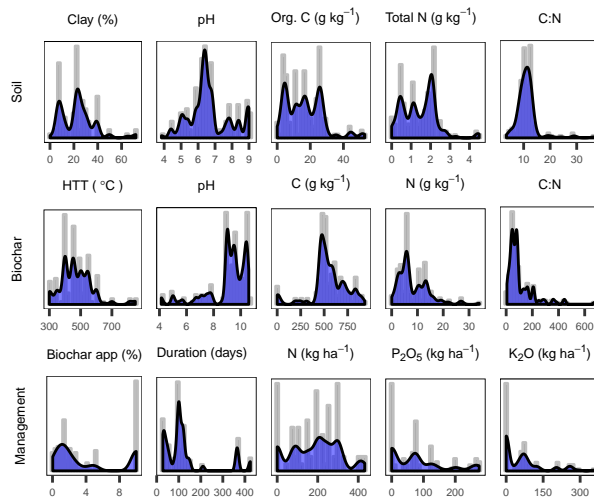

**Figure S1.** Kernel density plots of observed values for overall soil, biochar and management variables.

Table S1. Estimates from Bayesian mixed-effects meta-regression analysis (model 1) for the relationship between methane emission/uptake difference and intercept (Posterior mean of a parameter estimate, CI: 95% credible interval).

| Fixed effects                 | Posterior mode | Posterior mean | Lower CI | Upper CI |
|-------------------------------|----------------|----------------|----------|----------|
| Model1                        |                |                |          |          |
| Intercept(meta-analytic mean) | -0.02          | -0.01          | -0.15    | 0.13     |
| Random effects                |                |                |          |          |
| Study variance                | 0.08           | 0.13           | 0.03     | 0.28     |
| Residual variance             | 0.0001         | 0.0003         | 0.0001   | 0.0008   |

Sample sizes at different levels are: 40 studies and 158 effect sizes (these are true for all the models we ran).

Table S2. Estimates from Bayesian mixed-effects meta-regression analysis (model 2) for the relationship between methane emission/uptake difference and intercept (Posterior mean of a parameter estimate, CI: 95% credible interval).

| Fixed effects     | Posterior mode | Posterior mean(SD) | Lower CI | Upper CI |
|-------------------|----------------|--------------------|----------|----------|
| Model2            |                |                    |          |          |
| Water saturation  |                |                    |          |          |
| upland            | -0.02          | -0.04              | -0.2     | 0.1      |
| paddy soil        | 0.07           | 0.05               | -0.1     | 0.23     |
| Random effects    |                |                    |          |          |
| Study variance    | 0.12           | 0.16               | 0.03     | 0.35     |
| Residual variance | 0.0002         | 0.0003             | 0.0001   | 0.0007   |

Table S3. Estimates from Bayesian mixed-effects meta-regression analysis (model 3) for the relationship between methane emission/uptake difference and intercept (Posterior mean of a parameter estimate, CI: 95% credible interval)

| Fixed effects     | Posterior mode | Posterior mean(SD) | Lower CI | Upper CI |
|-------------------|----------------|--------------------|----------|----------|
| Model3            |                |                    |          |          |
| texture           |                |                    |          |          |
| coarse            | -0.06          | -0.09              | -0.23    | 0.05     |
| medium            | -0.01          | 0.01               | -0.11    | 0.16     |
| fine              | 0.06           | 0.03               | -0.12    | 0.16     |
| Random effects    |                |                    |          |          |
| Study variance    | 0.09           | 0.12               | 0.02     | 0.3      |
| Residual variance | 0.0002         | 0.003              | 0.00009  | 0.0006   |

Table S4. Estimates from Bayesian mixed-effects meta-regression analysis (model 4) for the relationship between methane emission/uptake difference and intercept (Posterior mean of a parameter estimate, CI: 95% credible interval).

| Fixed effects     | Posterior mode | Posterior mean(SD) | Lower CI | Upper CI |
|-------------------|----------------|--------------------|----------|----------|
| Model4            |                |                    |          |          |
| SOC               |                |                    |          |          |
| 0-<10             | -0.11          | -0.08              | -0.23    | 0.06     |
| 10-20             | -0.12          | -0.08              | -0.23    | 0.07     |
| >20               | 0.06           | 0.09               | -0.05    | 0.25     |
| Random effects    |                |                    |          |          |
| Study variance    | 0.12           | 0.16               | 0.03     | 0.34     |
| Residual variance | 0.0002         | 0.0003             | 0.0001   | 0.0005   |

Table S5. Estimates from Bayesian mixed-effects meta-regression analysis (model 5) for the relationship between methane emission/uptake difference and intercept (Posterior mean of a parameter estimate, CI: 95% credible interval).

| Fixed effects     | Posterior mode | Posterior mean(SD) | Lower CI | Upper CI |
|-------------------|----------------|--------------------|----------|----------|
| Model5            |                |                    |          |          |
| pH                |                |                    |          |          |
| >8                | -0.06          | -0.04              | -0.21    | 0.12     |
| 7-8               | -0.05          | -0.05              | -0.22    | 0.12     |
| 6-<7              | -0.02          | -0.03              | -0.21    | 0.12     |
| <6                | -0.02          | 0.01               | -0.15    | 0.18     |
| Random effects    |                |                    |          |          |
| Study variance    | 0.11           | 0.14               | 0.03     | 0.32     |
| Residual variance | 0.0002         | 0.0004             | 0.0001   | 0.0009   |

Table S6. Estimates from Bayesian mixed-effects meta-regression analysis (model 6) for the relationship between methane emission/uptake difference and intercept (Posterior mean of a parameter estimate, CI: 95% credible interval).

| Fixed effects  | Posterior mode | Posterior mean(SD) | Lower CI | Upper CI |
|----------------|----------------|--------------------|----------|----------|
| Model6         |                |                    |          |          |
| TN             |                |                    |          |          |
| >3             | -0.06          | -0.01              | -0.61    | 0.53     |
| 1.5-3          | 0.004          | 0.01               | -0.15    | 0.17     |
| <1.5           | -0.05          | -0.05              | -0.22    | 0.11     |
| Random effects |                |                    |          |          |
| Study variance | 0.11           | 0.16               | 0.04     | 0.38     |

|                   |        |        |        |       |
|-------------------|--------|--------|--------|-------|
| Residual variance | 0.0007 | 0.0009 | 0.0001 | 0.001 |
|-------------------|--------|--------|--------|-------|

Table S7. Estimates from Bayesian mixed-effects meta-regression analysis (model 7) for the relationship between methane emission/uptake difference and intercept (Posterior mean of a parameter estimate, CI: 95% credible interval).

| Fixed effects     | Posterior mode | Posterior mean(SD) | Lower CI | Upper CI |
|-------------------|----------------|--------------------|----------|----------|
| Model7            |                |                    |          |          |
| C/N               |                |                    |          |          |
| >10               | 0.02           | 0.01               | -0.11    | 0.16     |
| 7-<10             | -0.03          | -0.05              | -0.19    | 0.08     |
| <7                | -0.51          | -0.55              | -1.26    | 0.11     |
| Random effects    |                |                    |          |          |
| Study variance    | 0.06           | 0.12               | 0.03     | 0.25     |
| Residual variance | 0.0005         | 0.0009             | 0.0001   | 0.001    |

Table S8. Estimates from Bayesian mixed-effects meta-regression analysis (model 8) for the relationship between methane emission/uptake difference and intercept (Posterior mean of a parameter estimate, CI: 95% credible interval).

| Fixed effects   | Posterior mode | Posterior mean(SD) | Lower CI | Upper CI |
|-----------------|----------------|--------------------|----------|----------|
| Model8          |                |                    |          |          |
| Feedstocks      |                |                    |          |          |
| Wood            | 0.005          | 0.004              | -0.15    | 0.14     |
| Herbaceous      | 0.005          | 0.02               | -0.17    | 0.1      |
| Biosolids       | 0.14           | 0.26               | -0.69    | 1.48     |
| Manures         | -0.05          | 0.04               | -0.21    | 0.11     |
| Lignocellulosic | -0.01          | 0.03               | -0.19    | 0.12     |

|                   |       |        |         |        |
|-------------------|-------|--------|---------|--------|
| Random effects    |       |        |         |        |
| Study variance    | 0.08  | 0.14   | 0.03    | 0.33   |
| Residual variance | 0.003 | 0.0004 | 0.00009 | 0.0008 |

Table S9. Estimates from Bayesian mixed-effects meta-regression analysis (model 9) for the relationship between methane emission/uptake difference and intercept (Posterior mean of a parameter estimate, CI: 95% credible interval).

| Fixed effects     | Posterior mode | Posterior mean(SD) | Lower CI | Upper CI |
|-------------------|----------------|--------------------|----------|----------|
| Model9            |                |                    |          |          |
| Biochar pH        |                |                    |          |          |
| <7                | -0.002         | -0.02              | -0.16    | 0.14     |
| 7-<8              | -0.03          | -0.03              | -0.17    | 0.13     |
| 8-9               | -0.03          | -0.03              | -0.17    | 0.12     |
| >9                | -0.009         | -0.01              | -0.01    | 0.13     |
| Random effects    |                |                    |          |          |
| Study variance    | 0.08           | 0.14               | 0.03     | 0.29     |
| Residual variance | 0.003          | 0.0004             | 0.0001   | 0.0008   |

Table S10. Estimates from Bayesian mixed-effects meta-regression analysis (model 10) for the relationship between methane emission/uptake difference and intercept (Posterior mean of a parameter estimate, CI: 95% credible interval).

| Fixed effects       | Posterior mode | Posterior mean(SD) | Lower CI | Upper CI |
|---------------------|----------------|--------------------|----------|----------|
| Model10             |                |                    |          |          |
| Biochar temperature |                |                    |          |          |
| <400                | -0.05          | -0.03              | -0.16    | 0.13     |

|                   |        |        |        |        |
|-------------------|--------|--------|--------|--------|
| 401-500           | 0.01   | -0.002 | -0.15  | 0.14   |
| >500              | -0.01  | -0.014 | -0.15  | 0.14   |
| Random effects    |        |        |        |        |
| Study variance    | 0.08   | 0.14   | 0.03   | 0.31   |
| Residual variance | 0.0002 | 0.0004 | 0.0001 | 0.0008 |

Table S11. Estimates from Bayesian mixed-effects meta-regression analysis (model 11) for the relationship between methane emission/uptake difference and intercept (Posterior mean of a parameter estimate, CI: 95% credible interval).

| Fixed effects     | Posterior mode | Posterior mean(SD) | Lower CI | Upper CI |
|-------------------|----------------|--------------------|----------|----------|
| Model11           |                |                    |          |          |
| Biochar C/N       |                |                    |          |          |
| <50               | -0.09          | -0.03              | -0.18    | 0.11     |
| 50-100            | 0.01           | -0.02              | -0.16    | 0.12     |
| >100              | -0.03          | -0.002             | -0.13    | 0.15     |
| Random effects    |                |                    |          |          |
| Study variance    | 0.08           | 0.13               | 0.03     | 0.3      |
| Residual variance | 0.0002         | 0.0004             | 0.0001   | 0.0008   |

Table S12. Estimates from Bayesian mixed-effects meta-regression analysis (model 12) for the relationship between methane emission/uptake difference and intercept (Posterior mean of a parameter estimate, CI: 95% credible interval).

| Fixed effects    | Posterior mode | Posterior mean(SD) | Lower CI | Upper CI |
|------------------|----------------|--------------------|----------|----------|
| Model12          |                |                    |          |          |
| Biochar App rate |                |                    |          |          |



|                   |        |        |        |        |
|-------------------|--------|--------|--------|--------|
| <1                | 0.10   | 0.06   | -0.12  | 0.26   |
| 1-<2              | -0.12  | -0.08  | -0.25  | 0.11   |
| 2-<5              | -0.07  | -0.07  | -0.26  | 0.10   |
| >5                | 0.11   | 0.07   | -0.37  | 0.61   |
| Random effects    |        |        |        |        |
| Study variance    | 0.13   | 0.2    | 0.05   | 0.44   |
| Residual variance | 0.0002 | 0.0003 | 0.0001 | 0.0008 |

Table S13. Estimates from Bayesian mixed-effects meta-regression analysis (model 13) for the relationship between methane emission/uptake difference and intercept (Posterior mean of a parameter estimate, CI: 95% credible interval).

| Fixed effects       | Posterior mode | Posterior mean(SD) | Lower CI | Upper CI |
|---------------------|----------------|--------------------|----------|----------|
| Model13             |                |                    |          |          |
| Experimental method |                |                    |          |          |
| incubation          | -0.08          | -0.06              | -0.34    | 0.2      |
| pot                 | -0.02          | -0.008             | -0.23    | 0.25     |
| field               | -0.02          | 0.04               | -0.19    | 0.32     |
| Random effects      |                |                    |          |          |
| Study variance      | 0.09           | 0.22               | 0.04     | 0.49     |
| Residual variance   | 0.0002         | 0.0003             | 0.0001   | 0.0007   |

Table S14. Estimates from Bayesian mixed-effects meta-regression analysis (model 14) for the relationship between methane emission/uptake difference and intercept (Posterior mean of a parameter estimate, CI: 95% credible interval).

| Fixed effects     | Posterior mode | Posterior mean(SD) | Lower CI | Upper CI |
|-------------------|----------------|--------------------|----------|----------|
| Model14           |                |                    |          |          |
| Experimental time |                |                    |          |          |
| <60               | -0.13          | -0.11              | -0.42    | 0.13     |
| 60-150            | 0.02           | 0.02               | -0.17    | 0.19     |
| >150              | 0.05           | 0.02               | -0.18    | 0.21     |
| Random effects    |                |                    |          |          |
| Study variance    | 0.11           | 0.15               | 0.04     | 0.32     |
| Residual variance | 0.0002         | 0.0003             | 0.00009  | 0.0008   |

Table S15. Estimates from Bayesian mixed-effects meta-regression analysis (model 15) for the relationship between methane emission/uptake difference and intercept (Posterior mean of a parameter estimate, CI: 95% credible interval).

| Fixed effects     | Posterior mode | Posterior mean(SD) | Lower CI | Upper CI |
|-------------------|----------------|--------------------|----------|----------|
| Model15           |                |                    |          |          |
| Fertilizer N      |                |                    |          |          |
| NO                | -0.04          | -0.02              | -0.17    | 0.14     |
| <150              | -0.02          | -0.02              | -0.18    | 0.13     |
| 150-350           | -0.02          | -0.008             | -0.15    | 0.15     |
| >350              | -0.02          | -0.004             | -0.17    | 0.15     |
| Random effects    |                |                    |          |          |
| Study variance    | 0.09           | 0.14               | 0.03     | 0.32     |
| Residual variance | 0.0002         | 0.0004             | 0.0001   | 0.0009   |

Table S16. Estimates from Bayesian mixed-effects meta-regression analysis (model 16) for the relationship between methane emission/uptake difference and intercept (Posterior mean of a parameter estimate, CI: 95% credible interval).

| Fixed effects     | Posterior mode | Posterior mean(SD) | Lower CI | Upper CI |
|-------------------|----------------|--------------------|----------|----------|
| Model16           |                |                    |          |          |
| Fertilizer P2O5   |                |                    |          |          |
| NO                | -0.05          | -0.04              | -0.24    | 0.12     |
| <150              | -0.001         | 0.006              | -0.21    | 0.22     |
| >150              | 0.01           | 0.04               | -0.19    | 0.24     |
| Random effects    |                |                    |          |          |
| Study variance    | 0.08           | 0.15               | 0.039    | 0.32     |
| Residual variance | 0.0002         | 0.0003             | 0.0001   | 0.0007   |

Table S17. Estimates from Bayesian mixed-effects meta-regression analysis (model 17) for the relationship between methane emission/uptake difference and intercept (Posterior mean of a parameter estimate, CI: 95% credible interval).

| Fixed effects     | Posterior mode | Posterior mean(SD) | Lower CI | Upper CI |
|-------------------|----------------|--------------------|----------|----------|
| Model17           |                |                    |          |          |
| Fertilizer K2O    |                |                    |          |          |
| NO                | -0.07          | -0.07              | -0.25    | 0.11     |
| <150              | 0.04           | 0.05               | -0.16    | 0.24     |
| >150              | 0.07           | 0.05               | -0.16    | 0.26     |
| Random effects    |                |                    |          |          |
| Study variance    | 0.07           | 0.13               | 0.02     | 0.3      |
| Residual variance | 0.0002         | 0.0004             | 0.0001   | 0.0008   |

Table S18. Estimates from Bayesian mixed-effects meta-regression analysis (model 18) for the relationship between methane emission/uptake difference and intercept (Posterior mean of a parameter estimate, CI: 95% credible interval).

| Fixed effects                                  | Posterior mode | Posterior mean(SD) | Lower CI | Upper CI |
|------------------------------------------------|----------------|--------------------|----------|----------|
| Model18                                        |                |                    |          |          |
| Water saturation, soil pH, texture interaction |                |                    |          |          |
| Paddy coarse pH <6                             | 0.49           | 0.56               | -0.45    | 1.67     |
| Paddy coarse pH 6-<7                           | 0.15           | 0.09               | -0.19    | 0.35     |
| Paddy coarse pH 7-8                            | -2.43          | -2.67              | -4.28    | -1       |
| Paddy fine pH <6                               | 0.18           | 0.12               | -0.17    | 0.44     |
| Paddy fine pH 6-<7                             | 0.53           | 0.55               | -1.19    | 2.19     |
| Paddy medium pH <6                             | -0.02          | -0.07              | -0.48    | 0.35     |
| Paddy medium pH 6-<7                           | -0.28          | -0.23              | -0.86    | 0.36     |
| Paddy medium pH 7-8                            | 0.02           | -0.03              | -0.43    | 0.33     |
| upland coarse pH <6                            | -0.18          | -0.11              | -0.56    | 0.29     |
| upland coarse pH 6-<7                          | -0.22          | -0.26              | -0.5     | 0.01     |
| upland coarse pH 7-8                           | 0.003          | -0.008             | -0.27    | 0.24     |
| upland coarse pH >8                            | 0.04           | -0.01              | -0.48    | 0.43     |
| upland fine pH <6                              | 0.05           | 0.007              | -0.25    | 0.27     |
| upland fine pH 6-<7                            | -0.07          | -0.1               | -0.57    | 0.35     |
| upland medium pH <6                            | -0.03          | -0.06              | -0.42    | 0.44     |
| upland medium pH 6-<7                          | -0.006         | -0.03              | -0.32    | 0.18     |
| upland medium pH 7-8                           | 0.06           | -0.01              | -0.31    | 0.25     |
| upland medium pH >8                            | 0.004          | -0.03              | -0.28    | 0.21     |
| Random effects                                 |                |                    |          |          |
| Study variance                                 | 0.14           | 0.23               | 0.03     | 0.51     |

|                   |        |        |        |        |
|-------------------|--------|--------|--------|--------|
| Residual variance | 0.0002 | 0.0003 | 0.0001 | 0.0005 |
|-------------------|--------|--------|--------|--------|

Table S19. Estimates from Bayesian mixed-effects meta-regression analysis (model 19) for the relationship between methane emission/uptake difference and intercept (Posterior mean of a parameter estimate, CI: 95% credible interval).

| Fixed effects                                               | Posterior mode | Posterior mean(SD) | Lower CI | Upper CI |
|-------------------------------------------------------------|----------------|--------------------|----------|----------|
| Model19<br>Water saturation, SOC,<br>texture<br>interaction |                | 0.09               | 0.006    | 0.3      |
| Paddy coarse SOC 0-<10                                      | 1.17           | 1.16               | -0.18    | 2.42     |
| Paddy coarse SOC 10-20                                      | -0.62          | -0.45              | -0.99    | 0.24     |
| Paddy coarse SOC >20                                        | 0.11           | 0.11               | -0.08    | 0.35     |
| Paddy fine SOC 0-<10                                        | 0.14           | 0.44               | -0.94    | 1.94     |
| Paddy fine SOC 10-20                                        | 0.13           | 0.12               | -0.11    | 0.33     |
| Paddy fine SOC >20                                          | 0.28           | 0.28               | -0.59    | 1.38     |
| Paddy medium SOC 0-<10                                      | -0.07          | -0.05              | -0.33    | 0.21     |
| Paddy medium SOC 10-20                                      | -0.05          | -0.06              | -0.31    | 0.21     |
| Paddy medium SOC >20                                        | -0.09          | 0.08               | -1.17    | 1.52     |
| upland coarse SOC 0-<10                                     | -0.005         | 0.001              | -0.17    | 0.18     |
| upland coarse SOC 10-20                                     | -0.26          | -0.26              | -0.44    | -0.07    |
| upland coarse SOC >20                                       | -0.05          | -0.03              | -0.33    | 0.18     |
| upland fine SOC 0-<10                                       | 0.05           | 0.02               | -0.15    | 0.21     |
| upland fine SOC 10-20                                       | 0.24           | 0.12               | -0.49    | 0.82     |
| Upland fine SOC >20                                         | -0.03          | -0.03              | -0.31    | 0.21     |
| upland medium SOC 0-<10                                     | -0.04          | -0.01              | -0.2     | 0.14     |
| upland medium SOC 10-20                                     | -0.003         | -0.02              | -0.2     | 0.14     |

|                       |        |        |         |        |
|-----------------------|--------|--------|---------|--------|
| upland medium SOC >20 | -0.04  | -0.03  | -0.22   | 0.14   |
| Random effects        |        |        |         |        |
| Study variance        | 0.03   | 0.1    | 0.002   | 0.32   |
| Residual variance     | 0.0002 | 0.0003 | 0.00009 | 0.0005 |

Table S20. Estimates of the summary effect and the standard error from Bayesian mixed-effects meta-regression analysis (model 1) and traditional random-effect meta-analysis (CI: 95% credible interval) for the coarse-texture soil.

| Model                     | Summary mean effects | Lower CI | Upper CI | Standard error |
|---------------------------|----------------------|----------|----------|----------------|
| Model1                    | -0.022               | -0.585   | 0.714    | 1.006          |
| Traditional meta-analysis | -0.08                | -0.14    | -0.02    | 0.06           |

Datasets S1. The original data extracted from the individual studies for meta-anlysis

| reference         | Land use   | Analytical m | days   | Soil texture | Soil pH | Biochar pH |
|-------------------|------------|--------------|--------|--------------|---------|------------|
| Aguilar-Chávez    | upland     | pot          | <60    | coarse       | >8      | 8-9        |
| Aguilar-Chávez    | upland     | pot          | <60    | coarse       | >8      | 8-9        |
| Aguilar-Chávez    | upland     | pot          | <60    | coarse       | >8      | 8-9        |
| Ali et al.2013    | paddy soil | incubation   | 60-150 | medium       | 6-<7    | 8-9        |
| Ali et al.2013    | paddy soil | incubation   | 60-150 | medium       | 6-<7    | 8-9        |
| Angst et al,2014  | upland     | pot          | >150   | coarse       | 7-8     | 7-<8       |
| Angst et al,2014  | upland     | pot          | >150   | coarse       | 7-8     | 7-<8       |
| Barbosa de Souza  | paddy soil | field        | >150   | fine         | 6-<7    | >9         |
| Barbosa de Souza  | paddy soil | field        | >150   | fine         | 6-<7    | >9         |
| Bian et al,2014   | paddy soil | field        | >150   | fine         | <6      | 8-9        |
| Borchard et al,2  | upland     | incubation   | 60-150 | medium       | 6-<7    | 7-<8       |
| Borchard et al,2  | upland     | incubation   | 60-150 | medium       | 6-<7    | >9         |
| Díaz-Rojas et al  | upland     | pot          | <60    | coarse       | >8      | 8-9        |
| Díaz-Rojas et al  | upland     | pot          | <60    | coarse       | >8      | 8-9        |
| Feng et al, 201   | paddy soil | pot          | 60-150 | coarse       | 7-8     | >9         |
| Feng et al, 201   | paddy soil | pot          | 60-150 | coarse       | 7-8     | >9         |
| Feng et al, 201   | paddy soil | pot          | 60-150 | coarse       | 7-8     | >9         |
| Feng et al, 201   | paddy soil | pot          | 60-150 | medium       | <6      | >9         |
| Feng et al, 201   | paddy soil | pot          | 60-150 | medium       | <6      | >9         |
| Feng et al, 201   | paddy soil | pot          | 60-150 | medium       | <6      | >9         |
| Fungo et al, 2    | upland     | pot          | <60    | medium       | 6-<7    | >9         |
| Fungo et al, 2    | upland     | pot          | <60    | medium       | 6-<7    | >9         |
| Fungo et al, 2    | upland     | pot          | <60    | medium       | 6-<7    | >9         |
| Fungo et al, 2    | upland     | pot          | <60    | medium       | 6-<7    | >9         |
| Fungo et al, 2    | upland     | pot          | <60    | medium       | 6-<7    | 7-<8       |
| Fungo et al, 2    | upland     | pot          | <60    | medium       | 6-<7    | 7-<8       |
| Fungo et al, 2    | upland     | pot          | <60    | medium       | 6-<7    | >9         |
| Fungo et al, 2    | upland     | pot          | <60    | medium       | 6-<7    | >9         |
| Jia et al, 2012   | upland     | pot          | 60-150 | medium       | <6      | >9         |
| Jia et al, 2012   | upland     | pot          | 60-150 | medium       | <6      | >9         |
| Jia et al, 2012   | upland     | pot          | 60-150 | medium       | <6      | >9         |
| Jia et al, 2012   | upland     | pot          | 60-150 | medium       | <6      | >9         |
| Kang et al. 2014  | upland     | pot          | 60-150 | medium       | 6-<7    | 7-<8       |
| Kang et al. 2014  | upland     | pot          | 60-150 | medium       | 6-<7    | 7-<8       |
| Kang et al. 2014  | upland     | pot          | 60-150 | medium       | 6-<7    | 7-<8       |
| Kang et al. 2014  | paddy soil | field        | 60-150 | medium       | <6      | >9         |
| Kang et al. 2014  | paddy soil | field        | 60-150 | medium       | 6-<7    | >9         |
| Li et al, 2015    | upland     | field        | >150   | fine         | <6      | >9         |
| Li et al, 2015    | upland     | field        | >150   | fine         | <6      | >9         |
| Li et al, 2015    | upland     | field        | >150   | fine         | <6      | >9         |
| Li et al, 2015    | upland     | field        | >150   | fine         | <6      | >9         |
| Li et al, 2015    | upland     | field        | >150   | fine         | <6      | >9         |
| Li et al, 2015    | upland     | field        | >150   | fine         | <6      | >9         |
| Li Feiyue et al,2 | upland     | incubation   | <60    | fine         | <6      | >9         |

|                      |            |            |        |        |      |      |
|----------------------|------------|------------|--------|--------|------|------|
| Li Feiyue et al,2015 | upland     | incubation | <60    | fine   | <6   | >9   |
| Li Feiyue et al,2015 | upland     | incubation | <60    | medium | >8   | >9   |
| Li Feiyue et al,2015 | upland     | incubation | <60    | medium | >8   | >9   |
| Li Feiyue et al,2015 | upland     | incubation | <60    | coarse | 7-8  | >9   |
| Li Feiyue et al,2015 | upland     | incubation | <60    | coarse | 7-8  | >9   |
| Li Feiyue et al,2015 | upland     | incubation | <60    | medium | 6-<7 | >9   |
| Li Feiyue et al,2015 | upland     | incubation | <60    | medium | 6-<7 | >9   |
| Li Feiyue et al,2015 | upland     | incubation | <60    | medium | 7-8  | >9   |
| Li Feiyue et al,2015 | upland     | incubation | <60    | medium | 7-8  | >9   |
| Lin et al. 2015      | upland     | pot        | 60-150 | coarse | >8   | >9   |
| Lin et al. 2015      | upland     | pot        | 60-150 | coarse | >8   | >9   |
| Lin et al. 2015      | upland     | pot        | 60-150 | coarse | >8   | >9   |
| Lin et al. 2015      | upland     | pot        | >150   | coarse | >8   | >9   |
| Lin et al. 2015      | upland     | pot        | >150   | coarse | >8   | >9   |
| Lin et al. 2015      | upland     | pot        | >150   | coarse | >8   | >9   |
| LIU et al, 2015      | paddy soil | field      | 60-150 | coarse | 6-<7 | >9   |
| Liuqian Yu,2015      | paddy soil | incubation | 60-150 | medium | <6   | >9   |
| Liuqian Yu,2015      | upland     | incubation | 60-150 | medium | <6   | >9   |
| Yuxue Liu,2011       | paddy soil | incubation | <60    | coarse | <6   | >9   |
| Yuxue Liu,2011       | paddy soil | incubation | <60    | coarse | <6   | >9   |
| Yuxue Liu,2011       | paddy soil | incubation | <60    | coarse | <6   | >9   |
| Yuxue Liu,2011       | paddy soil | incubation | <60    | coarse | <6   | >9   |
| Yuxue Liu,2011       | paddy soil | incubation | <60    | coarse | <6   | >9   |
| Yuxue Liu,2011       | paddy soil | incubation | <60    | coarse | <6   | >9   |
| Ly Proyuth,2014      | paddy soil | pot        | 60-150 | coarse | <6   | 8-9  |
| Malghani et al,2015  | upland     | incubation | 60-150 | fine   | 6-<7 | <7   |
| Malghani et al,2015  | upland     | incubation | 60-150 | coarse | <6   | <7   |
| Malghani et al,2015  | upland     | incubation | 60-150 | medium | 6-<7 | >9   |
| Malghani et al,2015  | upland     | incubation | 60-150 | medium | 6-<7 | <7   |
| Mukherjee et al,2015 | upland     | field      | 60-150 | fine   | 6-<7 | >9   |
| Nguyen et al,2015    | upland     | incubation | 60-150 | fine   | <6   | 8-9  |
| Nguyen et al,2015    | upland     | incubation | 60-150 | fine   | <6   | 8-9  |
| Schimmelpfennig,2015 | upland     | field      | 60-150 | medium | <6   | >9   |
| Scheer et al,2015    | upland     | field      | <60    | fine   | <6   | <7   |
| Shen et al, 2015     | paddy soil | field      | 60-150 | fine   | <6   | >9   |
| Shen et al, 2015     | paddy soil | field      | 60-150 | fine   | <6   | >9   |
| Singla et al,2015    | paddy soil | pot        | 60-150 | coarse | <6   | 8-9  |
| Spokas et al,(2015)  | upland     | incubation | 60-150 | medium | 6-<7 | 7-<8 |
| Spokas et al,(2015)  | upland     | incubation | 60-150 | medium | 6-<7 | <7   |
| Spokas et al,(2015)  | upland     | incubation | 60-150 | medium | 6-<7 | >9   |
| Spokas et al,(2015)  | upland     | incubation | 60-150 | medium | 6-<7 | <7   |
| Spokas et al,(2015)  | upland     | incubation | 60-150 | medium | 6-<7 | 7-<8 |
| Spokas et al,(2015)  | upland     | incubation | 60-150 | medium | 6-<7 | <7   |
| Spokas et al,(2015)  | upland     | incubation | 60-150 | medium | 6-<7 | 8-9  |
| Spokas et al,(2015)  | upland     | incubation | 60-150 | medium | 6-<7 | 8-9  |



|                             |            |        |        |      |      |
|-----------------------------|------------|--------|--------|------|------|
| Spokas et al,(20upland      | incubation | 60-150 | medium | 6-<7 | <7   |
| Spokas et al,(20upland      | incubation | 60-150 | medium | 6-<7 | 8-9  |
| Spokas et al,(20upland      | incubation | 60-150 | medium | 6-<7 | 8-9  |
| Spokas et al,(20upland      | incubation | 60-150 | medium | 6-<7 | 7-<8 |
| Spokas et al,(20upland      | incubation | 60-150 | medium | 6-<7 | >9   |
| Spokas et al,(20upland      | incubation | 60-150 | medium | 6-<7 | 8-9  |
| Spokas et al,(20upland      | incubation | 60-150 | medium | 6-<7 | <7   |
| Spokas et al,(20upland      | incubation | 60-150 | medium | 6-<7 | 8-9  |
| Spokas et al,(20upland      | incubation | 60-150 | medium | 6-<7 | 8-9  |
| Spokas et al,(20upland      | incubation | 60-150 | medium | 6-<7 | 8-9  |
| Spokas et al,(20upland      | incubation | 60-150 | medium | 6-<7 | 8-9  |
| Spokas et al,(20upland      | incubation | 60-150 | coarse | 6-<7 | 8-9  |
| Spokas et al,(20upland      | incubation | 60-150 | coarse | 6-<7 | 8-9  |
| Spokas et al,(20upland      | incubation | 60-150 | coarse | 6-<7 | <7   |
| Spokas et al,(20upland      | incubation | 60-150 | coarse | 6-<7 | 8-9  |
| Spokas et al,(20upland      | incubation | 60-150 | coarse | 6-<7 | 8-9  |
| Spokas et al,(20upland      | incubation | 60-150 | coarse | 6-<7 | 7-<8 |
| Spokas et al,(20upland      | incubation | 60-150 | coarse | 6-<7 | >9   |
| Spokas et al,(20upland      | incubation | 60-150 | coarse | 6-<7 | 8-9  |
| Spokas et al,(20upland      | incubation | 60-150 | coarse | 6-<7 | <7   |
| Spokas et al,(20upland      | incubation | 60-150 | coarse | 6-<7 | 8-9  |
| Spokas et al,(20upland      | incubation | 60-150 | coarse | 6-<7 | 8-9  |
| Spokas et al,(20upland      | incubation | 60-150 | coarse | 6-<7 | 8-9  |
| Troy et al,2013 upland      | pot        | <60    | medium | 6-<7 | >9   |
| Troy et al,2013 upland      | pot        | <60    | medium | 6-<7 | >9   |
| Wang et al,201;paddy soil   | pot        | 60-150 | medium | 6-<7 | >9   |
| Wang et al,201;paddy soil   | pot        | 60-150 | medium | 6-<7 | >9   |
| Wang et al,201;paddy soil   | pot        | 60-150 | medium | 6-<7 | >9   |
| Wang et al,201;paddy soil   | pot        | 60-150 | medium | 6-<7 | >9   |
| Wu et al, 2014upland        | field      | 60-150 | medium | 7-8  | 8-9  |
| Xie et al, 2013 paddy soil  | pot        | 60-150 | coarse | 7-8  | >9   |
| Xie et al, 2013 paddy soil  | pot        | 60-150 | medium | <6   | >9   |
| Yoo et al,(2012, upland     | incubation | <60    | medium | 7-8  | <7   |
| Yoo et al,(2012, upland     | incubation | <60    | medium | 7-8  | 7-<8 |
| Yoo et al,(2012, paddy soil | incubation | <60    | medium | 7-8  | <7   |
| Yoo et al,(2012, paddy soil | incubation | <60    | medium | 7-8  | 7-<8 |
| Yoo et al,(2012, paddy soil | incubation | <60    | fine   | <6   | 7-<8 |
| Yoo et al,(2012, paddy soil | incubation | <60    | fine   | <6   | >9   |
| Yoo et al,(2012, paddy soil | incubation | <60    | fine   | <6   | <7   |
| Yoo et al,(2012, paddy soil | incubation | <60    | fine   | <6   | >9   |
| Zhang et al,(20;paddy soil  | field      | >150   | coarse | 6-<7 | >9   |
| Zhang et al,(20;paddy soil  | field      | >150   | coarse | 6-<7 | >9   |
| Zhang et al,(20;paddy soil  | field      | >150   | coarse | 6-<7 | >9   |
| Zhang et al,(20;paddy soil  | field      | >150   | coarse | 6-<7 | >9   |

|                               |            |        |        |      |    |
|-------------------------------|------------|--------|--------|------|----|
| Zhang et al,(2014) paddy soil | field      | >150   | coarse | 6-<7 | >9 |
| Zhang et al,(2014) paddy soil | field      | >150   | coarse | 6-<7 | >9 |
| Zhang et al,(2014) upland     | field      | 60-150 | medium | >8   | >9 |
| Zhang et al,(2014) upland     | field      | 60-150 | medium | >8   | >9 |
| Zhang et al,(2014) upland     | field      | 60-150 | medium | >8   | >9 |
| Zhang et al,(2014) upland     | field      | 60-150 | medium | >8   | >9 |
| Zhang et al,(2014) paddy soil | field      | 60-150 | coarse | 6-<7 | >9 |
| Zhang et al,(2014) paddy soil | field      | 60-150 | coarse | 6-<7 | >9 |
| Zhang et al,(2014) paddy soil | field      | 60-150 | coarse | 6-<7 | >9 |
| Zhang et al,(2014) paddy soil | field      | 60-150 | coarse | 6-<7 | >9 |
| Zhang dengxia(2014) upland    | field      | >150   | coarse | >8   | >9 |
| Zhang dengxia(2014) upland    | field      | >150   | coarse | >8   | >9 |
| Zhang dengxia(2014) upland    | field      | >150   | coarse | >8   | >9 |
| Zhang dengxia(2014) upland    | field      | >150   | coarse | >8   | >9 |
| Zhao et al,2014 paddy soil    | pot        | 60-150 | medium | 6-<7 | >9 |
| Zhao et al,2014 paddy soil    | pot        | 60-150 | medium | 6-<7 | >9 |
| Zheng et al,2014 upland       | incubation | 60-150 | medium | >8   | >9 |
| Zheng et al,2014 upland       | incubation | 60-150 | medium | >8   | >9 |
| Zheng et al,2014 upland       | incubation | 60-150 | medium | >8   | >9 |
| Zheng et al,2014 upland       | incubation | 60-150 | medium | >8   | >9 |
| Zheng et al,2014 upland       | incubation | 60-150 | medium | 6-<7 | >9 |
| Zheng et al,2014 upland       | incubation | 60-150 | medium | 6-<7 | >9 |
| Zheng et al,2014 upland       | incubation | 60-150 | medium | 6-<7 | >9 |
| Zheng et al,2014 upland       | incubation | 60-150 | medium | 6-<7 | >9 |

| HTTC    | Feed stocks   | Bio app ra | Bio C/N | Soil C/N | Soil N | SOC   |
|---------|---------------|------------|---------|----------|--------|-------|
| <400    | wood (oak, r  | 1-<2       | >100    | >10      | 1.5-3  | >20   |
| <400    | wood (oak, r  | 2-<5       | >100    | >10      | 1.5-3  | >20   |
| <400    | wood (oak, r  | 2-<5       | >100    | >10      | 1.5-3  | >20   |
| 401-500 | herbaceous    | <1         | 50-100  | >10      | 1.5-3  | >20   |
| 401-500 | herbaceous    | <1         | 50-100  | >10      | 1.5-3  | >20   |
| >500    | wood (oak, r  | <1         | 50-100  | >10      | >3     | >20   |
| >500    | wood (oak, r  | 1-<2       | 50-100  | >10      | >3     | >20   |
| <400    | lignocellulos | <1         | >100    | >10      | <1.5   | 0-<10 |
| <400    | lignocellulos | <1         | >100    | >10      | <1.5   | 0-<10 |
| 401-500 | biowaste (m   | 2-<5       | <50     | >10      | <1.5   | >20   |
| >500    | wood (oak, r  | >5         | >100    | 7-<10    | 1.5-3  | >20   |
| >500    | wood (oak, r  | >5         | >100    | 7-<10    | 1.5-3  | >20   |
| <400    | wood (oak, r  | 2-<5       | >100    | >10      | 1.5-3  | >20   |
| <400    | wood (oak, r  | 2-<5       | >100    | >10      | 1.5-3  | >20   |
| <400    | herbaceous    | 1-<2       | <50     | <7       | <1.5   | 0-<10 |
| <400    | herbaceous    | 1-<2       | 50-100  | <7       | <1.5   | 0-<10 |
| 401-500 | herbaceous    | 1-<2       | 50-100  | <7       | <1.5   | 0-<10 |
| <400    | herbaceous    | 1-<2       | <50     | <7       | <1.5   | 0-<10 |
| <400    | herbaceous    | 1-<2       | 50-100  | <7       | <1.5   | 0-<10 |
| 401-500 | herbaceous    | 1-<2       | 50-100  | <7       | <1.5   | 0-<10 |
| <400    | herbaceous    | 1-<2       | 50-100  | >10      | <1.5   | 0-<10 |
| <400    | herbaceous    | 1-<2       | 50-100  | >10      | <1.5   | 0-<10 |
| >500    | herbaceous    | 1-<2       | >100    | >10      | <1.5   | 0-<10 |
| >500    | herbaceous    | 1-<2       | >100    | >10      | <1.5   | 0-<10 |
| <400    | wood (oak, r  | 1-<2       | >100    | >10      | <1.5   | 0-<10 |
| <400    | wood (oak, r  | 1-<2       | >100    | >10      | <1.5   | 0-<10 |
| >500    | wood (oak, r  | 1-<2       | >100    | >10      | <1.5   | 0-<10 |
| >500    | wood (oak, r  | 1-<2       | >100    | >10      | <1.5   | 0-<10 |
| <400    | herbaceous    | 1-<2       | <50     | 7-<10    | 1.5-3  | 10-20 |
| <400    | herbaceous    | 2-<5       | <50     | 7-<10    | 1.5-3  | 10-20 |
| <400    | herbaceous    | 1-<2       | <50     | 7-<10    | 1.5-3  | 10-20 |
| <400    | herbaceous    | 1-<2       | <50     | 7-<10    | 1.5-3  | 10-20 |
| <400    | herbaceous    | <1         | 50-100  | >10      | <1.5   | 10-20 |
| <400    | herbaceous    | <1         | 50-100  | >10      | <1.5   | 10-20 |
| <400    | herbaceous    | <1         | 50-100  | >10      | <1.5   | 10-20 |
| <400    | herbaceous    | <1         | 50-100  | <10      | <1.5   | 0-<10 |
| <400    | herbaceous    | <1         | 50-100  | <10      | <1.5   | 10-20 |
| <400    | herbaceous    | 1-<2       | 50-100  | 7-<10    | 1.5-3  | 10-20 |
| <400    | herbaceous    | 1-<2       | 50-100  | 7-<10    | 1.5-3  | 10-20 |
| <400    | herbaceous    | 1-<2       | 50-100  | 7-<10    | 1.5-3  | 10-20 |
| <400    | herbaceous    | 2-<5       | 50-100  | 7-<10    | 1.5-3  | 10-20 |
| <400    | herbaceous    | 2-<5       | 50-100  | 7-<10    | 1.5-3  | 10-20 |
| <400    | herbaceous    | 2-<5       | 50-100  | 7-<10    | 1.5-3  | 10-20 |
| <400    | herbaceous    | 2-<5       | <50     | >10      | <1.5   | 0-<10 |

|         |               |      |        |       |       |       |
|---------|---------------|------|--------|-------|-------|-------|
| 401-500 | herbaceous    | 2-<5 | <50    | >10   | <1.5  | 0-<10 |
| <400    | herbaceous    | 2-<5 | <50    | >10   | <1.5  | 0-<10 |
| 401-500 | herbaceous    | 2-<5 | <50    | >10   | <1.5  | 0-<10 |
| <400    | herbaceous    | 2-<5 | <50    | >10   | <1.5  | 0-<10 |
| 401-500 | herbaceous    | 2-<5 | <50    | >10   | <1.5  | 0-<10 |
| <400    | herbaceous    | 2-<5 | <50    | >10   | 1.5-3 | >20   |
| 401-500 | herbaceous    | 2-<5 | <50    | >10   | 1.5-3 | >20   |
| <400    | herbaceous    | 2-<5 | <50    | >10   | <1.5  | 10-20 |
| 401-500 | herbaceous    | 2-<5 | <50    | >10   | <1.5  | 10-20 |
| <400    | herbaceous    | <1   | 50-100 | 7-<10 | <1.5  | 0-<10 |
| <400    | herbaceous    | <1   | 50-100 | 7-<10 | <1.5  | 0-<10 |
| <400    | herbaceous    | 1-<2 | 50-100 | 7-<10 | <1.5  | 0-<10 |
| <400    | herbaceous    | <1   | 50-100 | 7-<10 | <1.5  | 0-<10 |
| <400    | herbaceous    | <1   | 50-100 | 7-<10 | <1.5  | 0-<10 |
| <400    | herbaceous    | 1-<2 | 50-100 | 7-<10 | <1.5  | 0-<10 |
| <400    | herbaceous    | <1   | <50    | 7-<10 | 1.5-3 | 10-20 |
| >500    | manures or    | 1>5  | <50    | >10   | <1.5  | 10-20 |
| >500    | manures or    | 1>5  | <50    | >10   | <1.5  | >20   |
| >500    | wood (oak, ρ  | <1   | >100   | >10   | 1.5-3 | 10-20 |
| >500    | wood (oak, ρ  | 1-<2 | >100   | >10   | 1.5-3 | 10-20 |
| >500    | wood (oak, ρ  | 2-<5 | >100   | >10   | 1.5-3 | 10-20 |
| >500    | herbaceous    | <1   | <50    | >10   | 1.5-3 | 10-20 |
| >500    | herbaceous    | 1-<2 | <50    | >10   | 1.5-3 | 10-20 |
| >500    | herbaceous    | 2-<5 | <50    | >10   | 1.5-3 | 10-20 |
| 401-500 | herbaceous    | <1   | <50    | 7-<10 | <1.5  | 0-<10 |
| 401-500 | herbaceous    | 1-<2 | <50    | >10   | 1.5-3 | >20   |
| 401-500 | herbaceous    | 1-<2 | <50    | >10   | 1.5-3 | >20   |
| 401-500 | herbaceous    | 1-<2 | <50    | >10   | 1.5-3 | >20   |
| 401-500 | herbaceous    | 1-<2 | <50    | >10   | 1.5-3 | >20   |
| >500    | wood (oak, ρ  | <1   | >100   | >10   | 1.5-3 | >20   |
| 401-500 | herbaceous    | 2-<5 | >100   | >10   | 1.5-3 | >20   |
| 401-500 | herbaceous    | 1-<2 | >100   | >10   | 1.5-3 | >20   |
| >500    | herbaceous    | <1   | >100   | >10   | 1.5-3 | >20   |
| >500    | manures or    | 1<1  | <50    | 7-<10 | >3    | >20   |
| <400    | herbaceous    | <1   | 50-100 | 7-<10 | 1.5-3 | 10-20 |
| <400    | herbaceous    | 1-<2 | 50-100 | 7-<10 | 1.5-3 | 10-20 |
| <400    | herbaceous    | <1   | <50    | >10   | 1.5-3 | 10-20 |
| >500    | wood (oak, ρ  | >5   | >100   | >10   | 1.5-3 | >20   |
| >500    | wood (oak, ρ  | >5   | >100   | >10   | 1.5-3 | >20   |
| >500    | wood (oak, ρ  | >5   | >100   | >10   | 1.5-3 | >20   |
| >500    | wood (oak, ρ  | >5   | >100   | >10   | 1.5-3 | >20   |
| >500    | lignocellulos | >5   | >100   | >10   | 1.5-3 | >20   |
| >500    | lignocellulos | >5   | >100   | >10   | 1.5-3 | >20   |
| >500    | herbaceous    | >5   | 50-100 | >10   | 1.5-3 | >20   |
| 401-500 | wood (oak, ρ  | >5   | >100   | >10   | 1.5-3 | >20   |

|         |               |        |        |       |       |       |
|---------|---------------|--------|--------|-------|-------|-------|
| 401-500 | lignocellulos | >5     | <50    | >10   | 1.5-3 | >20   |
| 401-500 | herbaceous    | >5     | <50    | >10   | 1.5-3 | >20   |
| 401-500 | herbaceous    | >5     | <50    | >10   | 1.5-3 | >20   |
| 401-500 | manures or    | ı>5    | <50    | >10   | 1.5-3 | >20   |
| >500    | manures or    | ı>5    | <50    | >10   | 1.5-3 | >20   |
| 401-500 | wood (oak, ı  | >5     | >100   | >10   | 1.5-3 | >20   |
| 401-500 | lignocellulos | >5     | 50-100 | >10   | 1.5-3 | >20   |
| >500    | herbaceous    | >5     | 50-100 | >10   | 1.5-3 | >20   |
| >500    | herbaceous    | >5     | 50-100 | >10   | 1.5-3 | >20   |
| 401-500 | lignocellulos | >5     | >100   | >10   | 1.5-3 | >20   |
| >500    | wood (oak, ı  | >5     | >100   | >10   | 1.5-3 | >20   |
| >500    | herbaceous    | >5     | 50-100 | 7-<10 | <1.5  | 10-20 |
| 401-500 | wood (oak, ı  | >5     | >100   | 7-<10 | <1.5  | 10-20 |
| 401-500 | lignocellulos | >5     | <50    | 7-<10 | <1.5  | 10-20 |
| 401-500 | herbaceous    | >5     | <50    | 7-<10 | <1.5  | 10-20 |
| 401-500 | herbaceous    | >5     | <50    | 7-<10 | <1.5  | 10-20 |
| 401-500 | manures or    | ı>5    | <50    | 7-<10 | <1.5  | 10-20 |
| >500    | manures or    | ı>5    | <50    | 7-<10 | <1.5  | 10-20 |
| 401-500 | wood (oak, ı  | >5     | >100   | 7-<10 | <1.5  | 10-20 |
| 401-500 | lignocellulos | >5     | 50-100 | 7-<10 | <1.5  | 10-20 |
| >500    | herbaceous    | >5     | 50-100 | 7-<10 | <1.5  | 10-20 |
| >500    | herbaceous    | >5     | 50-100 | 7-<10 | <1.5  | 10-20 |
| 401-500 | lignocellulos | >5     | >100   | 7-<10 | <1.5  | 10-20 |
| >500    | wood (oak, ı  | >5     | >100   | 7-<10 | <1.5  | 10-20 |
| >500    | manures or    | ı<1    | <50    | >10   | 1.5-3 | >20   |
| >500    | wood (oak, ı  | <1     | >100   | >10   | 1.5-3 | >20   |
| 401-500 | herbaceous    | 1-<2   | 50-100 | >10   | <1.5  | 0-<10 |
| 401-500 | herbaceous    | 2-<5   | 50-100 | >10   | <1.5  | 0-<10 |
| 401-500 | herbaceous    | 1-<2   | 50-100 | >10   | <1.5  | 0-<10 |
| 401-500 | herbaceous    | 2-<5   | 50-100 | >10   | <1.5  | 0-<10 |
| <400    | herbaceous    | <1     | >100   | 7-<10 | <1.5  | 0-<10 |
| <400    | herbaceous    | <1     | <50    | >10   | 1.5-3 | 10-20 |
| <400    | herbaceous    | <1     | <50    | 7-<10 | <1.5  | 0-<10 |
| <400    | herbaceous    | 2-<5   | <50    | >10   | <1.5  | 0-<10 |
| >500    | manures or    | ı 2-<5 | <50    | >10   | <1.5  | 0-<10 |
| <400    | herbaceous    | 2-<5   | <50    | 7-<10 | <1.5  | 0-<10 |
| >500    | manures or    | ı 2-<5 | <50    | 7-<10 | <1.5  | 0-<10 |
| <400    | herbaceous    | 2-<5   | <50    | >10   | 1.5-3 | 10-20 |
| >500    | herbaceous    | 2-<5   | 50-100 | >10   | 1.5-3 | 10-20 |
| <400    | herbaceous    | 2-<5   | 50-100 | >10   | 1.5-3 | 10-20 |
| >500    | herbaceous    | 2-<5   | 50-100 | >10   | 1.5-3 | 10-20 |
| 401-500 | herbaceous    | <1     | 50-100 | >10   | 1.5-3 | >20   |
| 401-500 | herbaceous    | 1-<2   | 50-100 | >10   | 1.5-3 | >20   |
| 401-500 | herbaceous    | 2-<5   | 50-100 | >10   | 1.5-3 | >20   |
| 401-500 | herbaceous    | <1     | 50-100 | >10   | 1.5-3 | >20   |

|         |                      |      |        |       |       |       |
|---------|----------------------|------|--------|-------|-------|-------|
| 401-500 | herbaceous           | 1-<2 | 50-100 | >10   | 1.5-3 | >20   |
| 401-500 | herbaceous           | 2-<5 | 50-100 | >10   | 1.5-3 | >20   |
| 401-500 | herbaceous           | 1-<2 | 50-100 | >10   | <1.5  | 10-20 |
| 401-500 | herbaceous           | 1-<2 | 50-100 | >10   | <1.5  | 10-20 |
| 401-500 | herbaceous           | 1-<2 | 50-100 | >10   | 1.5-3 | 10-20 |
| 401-500 | herbaceous           | 1-<2 | 50-100 | >10   | 1.5-3 | 10-20 |
| 401-500 | herbaceous           | <1   | 50-100 | >10   | 1.5-3 | >20   |
| 401-500 | herbaceous           | 2-<5 | 50-100 | >10   | 1.5-3 | >20   |
| 401-500 | herbaceous           | <1   | 50-100 | >10   | 1.5-3 | >20   |
| 401-500 | herbaceous           | 2-<5 | 50-100 | >10   | 1.5-3 | >20   |
| 401-500 | herbaceous           | 1-<2 | 50-100 | 7-<10 | <1.5  | 0-<10 |
| 401-500 | herbaceous           | 2-<5 | 50-100 | 7-<10 | <1.5  | 0-<10 |
| 401-500 | herbaceous           | 1-<2 | 50-100 | 7-<10 | <1.5  | 0-<10 |
| 401-500 | herbaceous           | 2-<5 | 50-100 | 7-<10 | <1.5  | 0-<10 |
| >500    | herbaceous           | <1   | 50-100 | 7-<10 | 1.5-3 | 10-20 |
| >500    | herbaceous           | <1   | 50-100 | 7-<10 | 1.5-3 | 10-20 |
| >500    | wood (oak, $r > 5$ ) |      | >100   | 7-<10 | <1.5  | 0-<10 |
| >500    | wood (oak, $r > 5$ ) |      | >100   | 7-<10 | <1.5  | 0-<10 |
| >500    | wood (oak, $r > 5$ ) |      | >100   | 7-<10 | <1.5  | 0-<10 |
| >500    | wood (oak, $r > 5$ ) |      | >100   | 7-<10 | <1.5  | 0-<10 |
| >500    | wood (oak, $r > 5$ ) |      | >100   | >10   | 1.5-3 | 10-20 |
| >500    | wood (oak, $r > 5$ ) |      | >100   | >10   | 1.5-3 | 10-20 |
| >500    | wood (oak, $r > 5$ ) |      | >100   | >10   | 1.5-3 | 10-20 |
| >500    | wood (oak, $r > 5$ ) |      | >100   | >10   | 1.5-3 | 10-20 |

| Fertilizer N | Fertilizer P2O5 | Fertilizer K2O | raw difference | standard deviation | N |
|--------------|-----------------|----------------|----------------|--------------------|---|
| 150          | N               | N              | 0.00077006     | 0.00381185         | 5 |
| 150          | N               | N              | -0.0002449     | 0.00347066         | 5 |
| 150          | N               | N              | -0.0017149     | 0.00279449         | 5 |
| 150          | 150             | 150            | 0.10463378     | 0.88806272         | 3 |
| 150          | 150             | 150            | 0.10463378     | 0.62140088         | 3 |
| >350         | 150             | >150           | 0.01598153     | 0.07218361         | 3 |
| >350         | 150             | >150           | -0.0543377     | 0.09047439         | 3 |
| 150          | 150             | 150            | -0.5707611     | 1.14406814         | 4 |
| 150-350      | >150            | >150           | 1.31542075     | 0.87134206         | 4 |
| 150-350      | >150            | >150           | 0.28329148     | 0.15935909         | 3 |
| N            | N               | N              | 0.2648352      | 0.42728467         | 4 |
| N            | N               | N              | 1.919813       | 0.92228314         | 4 |
| 150          | N               | N              | -5.60E-06      | 0.00011636         | 3 |
| 150          | N               | N              | -0.0000028     | 0.00011571         | 3 |
| 150-350      | 150             | 150            | -4.0961748     | 4.67075977         | 3 |
| 150-350      | 150             | 150            | -1.1279365     | 3.36435809         | 3 |
| 150-350      | 150             | 150            | -4.630444      | 4.76059761         | 3 |
| 150-350      | 150             | 150            | -2.6394424     | 2.68108533         | 3 |
| 150-350      | 150             | 150            | 0.14072442     | 1.58132623         | 3 |
| 150-350      | 150             | 150            | -2.4606951     | 2.67682353         | 3 |
| N            | N               | 150            | 0.16382365     | 0.11297575         | 4 |
| N            | N               | 150            | 0.39370377     | 0.04365379         | 4 |
| N            | N               | 150            | 0.32500539     | 0.06184212         | 4 |
| N            | N               | 150            | 0.53110748     | 0.02851859         | 4 |
| N            | N               | 150            | 0.6288719      | 0.04728829         | 4 |
| N            | N               | 150            | 0.256307       | 0.08325991         | 4 |
| N            | N               | 150            | 0.56545321     | 0.03225298         | 4 |
| N            | N               | 150            | 0.27479978     | 0.07724055         | 4 |
| >350         | N               | N              | -0.0285714     | 0.03248321         | 3 |
| >350         | N               | N              | -0.0217687     | 0.01125365         | 3 |
| 150-350      | N               | N              | -0.0302721     | 0.00515468         | 3 |
| 150-350      | N               | N              | -0.0333333     | 0.00579896         | 3 |
| 150-350      | >150            | >150           | -0.8970253     | 0.2933222          | 3 |
| 150-350      | >150            | >150           | -0.9719968     | 0.25825374         | 3 |
| 150-350      | >150            | >150           | -1.4219545     | 0.35345328         | 3 |
| 150          | 150             | 150            | -0.1394231     | 0.2001233          | 3 |
| 150          | 150             | 150            | -1.2668269     | 0.15808226         | 3 |
| N            | N               | N              | 0.10179739     | 0.16259809         | 3 |
| >350         | >150            | >150           | 0.17843137     | 0.08336868         | 3 |
| >350         | >150            | >150           | 0.06862745     | 0.09356974         | 3 |
| N            | N               | N              | 0.08464053     | 0.11235186         | 3 |
| >350         | >150            | >150           | 0.30996732     | 0.24409865         | 3 |
| >350         | >150            | >150           | 0.12467321     | 0.07388157         | 3 |
| N            | N               | N              | -0.0102403     | 0.00135577         | 3 |

|         |      |      |            |            |   |
|---------|------|------|------------|------------|---|
| N       | N    | N    | 0.089638   | 0.00342984 | 3 |
| N       | N    | N    | -0.030922  | 0.0043231  | 3 |
| N       | N    | N    | -0.002693  | 0.00452759 | 3 |
| N       | N    | N    | -0.0274247 | 0.00285352 | 3 |
| N       | N    | N    | 0.03954075 | 0.00349924 | 3 |
| N       | N    | N    | -0.0483978 | 0.01437311 | 3 |
| N       | N    | N    | 0.02759975 | 0.01617232 | 3 |
| N       | N    | N    | -0.0382021 | 0.01600713 | 3 |
| N       | N    | N    | 0.02381325 | 0.0223752  | 3 |
| 150     | 150  | 150  | -0.0050593 | 0.0135353  | 3 |
| 150     | 150  | 150  | 0.01855081 | 0.0151231  | 3 |
| 150     | 150  | 150  | 0.01517783 | 0.01982298 | 3 |
| 150     | 150  | 150  | -0.016262  | 0.01256157 | 3 |
| 150     | 150  | 150  | 0.00180637 | 0.01327771 | 3 |
| 150     | 150  | 150  | 0.0036142  | 0.01678115 | 3 |
| 150-350 | 150  | 150  | -0.1700913 | 0.16859974 | 3 |
| N       | N    | N    | -0.0135173 | 0.00622449 | 9 |
| N       | N    | N    | -0.025597  | 0.01220702 | 9 |
| N       | N    | N    | -0.1157786 | 0.05767565 | 4 |
| N       | N    | N    | -0.5266125 | 0.04819409 | 4 |
| N       | N    | N    | -0.7843157 | 0.0282604  | 4 |
| N       | N    | N    | -0.698415  | 0.0295276  | 4 |
| N       | N    | N    | -1.348275  | 0.03174725 | 4 |
| N       | N    | N    | -1.3930929 | 0.02856726 | 4 |
| 150-350 | >150 | >150 | 2.85931297 | 0.52918769 | 3 |
| N       | N    | N    | 0.04145656 | 0.0183444  | 4 |
| N       | N    | N    | 0.0352796  | 0.0103686  | 4 |
| N       | N    | N    | -0.0440838 | 0.04098208 | 4 |
| N       | N    | N    | 3.8598624  | 0.85428777 | 4 |
| N       | N    | N    | -0.2612039 | 0.52805597 | 3 |
| 150-350 | N    | N    | 0          | 0.00134769 | 6 |
| 150-350 | N    | N    | -0.000107  | 0.00134769 | 6 |
| 150-350 | N    | N    | -0.0182782 | 0.00604291 | 3 |
| 150-350 | 150  | 150  | 0.00059882 | 0.00017662 | 3 |
| 150-350 | 150  | 150  | 0.05786209 | 0.12658275 | 3 |
| 150-350 | 150  | 150  | 0.30861624 | 0.33370751 | 3 |
| 150     | >150 | 150  | 3.86757426 | 0.61906967 | 3 |
| N       | N    | N    | 0.18435921 | 0.0458171  | 3 |
| N       | N    | N    | -0.0355621 | 0.04220907 | 3 |
| N       | N    | N    | 0.2610965  | 0.02831692 | 3 |
| N       | N    | N    | 0.0232071  | 0.047294   | 3 |
| N       | N    | N    | 0.09826124 | 0.0465535  | 3 |
| N       | N    | N    | -0.0497868 | 0.0847897  | 3 |
| N       | N    | N    | 0.00280897 | 0.00255425 | 3 |
| N       | N    | N    | 0.00412612 | 0.00253445 | 3 |



|         |      |      |            |            |   |
|---------|------|------|------------|------------|---|
| N       | N    | N    | 0.01124589 | 0.00249619 | 3 |
| N       | N    | N    | 0.01339199 | 0.0027024  | 3 |
| N       | N    | N    | 0.00559074 | 0.00274108 | 3 |
| N       | N    | N    | 0.01801566 | 0.00257746 | 3 |
| N       | N    | N    | 0.00391423 | 0.0024962  | 3 |
| N       | N    | N    | 0.00389605 | 0.00250536 | 3 |
| N       | N    | N    | -0.0005896 | 0.00250537 | 3 |
| N       | N    | N    | 0.00553563 | 0.00257746 | 3 |
| N       | N    | N    | 0.00353655 | 0.0024962  | 3 |
| N       | N    | N    | 0.00186964 | 0.00260398 | 3 |
| N       | N    | N    | -0.0032883 | 0.00573663 | 3 |
| N       | N    | N    | -0.2181827 | 0.0089913  | 3 |
| N       | N    | N    | -0.2189415 | 0.00899366 | 3 |
| N       | N    | N    | -0.2194256 | 0.00899191 | 3 |
| N       | N    | N    | -0.2191549 | 0.00899366 | 3 |
| N       | N    | N    | -0.2189528 | 0.00899191 | 3 |
| N       | N    | N    | -0.219437  | 0.0089913  | 3 |
| N       | N    | N    | -0.2197153 | 0.00899191 | 3 |
| N       | N    | N    | -0.2194485 | 0.00899191 | 3 |
| N       | N    | N    | -0.2197956 | 0.0089961  | 3 |
| N       | N    | N    | -0.218564  | 0.0089961  | 3 |
| N       | N    | N    | -0.218911  | 0.00899366 | 3 |
| N       | N    | N    | -0.2200128 | 0.00900107 | 3 |
| N       | N    | N    | -0.2200204 | 0.00901571 | 3 |
| 150-350 | N    | N    | -0.4045665 | 0.02231466 | 3 |
| 150-350 | N    | N    | -0.3990067 | 0.02231453 | 3 |
| N       | 150  | 150  | 0.10435824 | 0.07515651 | 3 |
| N       | 150  | 150  | 0.1052682  | 0.07335637 | 3 |
| 150-350 | 150  | 150  | 0.10929119 | 0.07768866 | 3 |
| 150-350 | 150  | 150  | 0.15886015 | 0.03125158 | 3 |
| 150-350 | >150 | 150  | 0.30750719 | 0.0729499  | 3 |
| 150-350 | 150  | 150  | -3.2364765 | 1.10531799 | 3 |
| 150-350 | 150  | 150  | -2.185079  | 0.49100796 | 3 |
| N       | N    | N    | -0.0560812 | 0.01318916 | 6 |
| N       | N    | N    | -0.2698594 | 0.01792526 | 6 |
| N       | N    | N    | -0.1266872 | 0.02580701 | 6 |
| N       | N    | N    | -0.20631   | 0.02914489 | 6 |
| 150-350 | N    | N    | -0.0009237 | 0.00071007 | 6 |
| 150-350 | N    | N    | 0.10162928 | 0.00903988 | 6 |
| 150-350 | N    | N    | 0.00016762 | 0.00063032 | 6 |
| 150-350 | N    | N    | 0.00153713 | 0.00071019 | 6 |
| >350    | >150 | >150 | -0.0177226 | 0.0247306  | 3 |
| >350    | >150 | >150 | 0.1708938  | 0.04445624 | 3 |
| >350    | >150 | >150 | 0.0291151  | 0.07660056 | 3 |
| 150-350 | >150 | >150 | 0.02658348 | 0.01301252 | 3 |

|         |      |      |            |            |   |
|---------|------|------|------------|------------|---|
| 150-350 | >150 | >150 | 0.02151996 | 0.00994072 | 3 |
| 150-350 | >150 | >150 | 0.05823048 | 0.01136945 | 3 |
| N       | 150  | 150  | 0.02018564 | 0.00430235 | 3 |
| N       | 150  | 150  | -0.018083  | 0.00383893 | 3 |
| 150-350 | 150  | 150  | 0.01101428 | 0.00191024 | 3 |
| 150-350 | 150  | 150  | 0.01186154 | 0.00191024 | 3 |
| N       | 150  | 150  | 1.56325633 | 0.05981537 | 3 |
| N       | 150  | 150  | 1.62871288 | 0.2346314  | 3 |
| 150-350 | 150  | 150  | -0.0808581 | 0.27012219 | 3 |
| 150-350 | 150  | 150  | 1.45159516 | 0.32826273 | 3 |
| >350    | 150  | N    | -4.07E-05  | 0.00123997 | 3 |
| >350    | 150  | N    | -0.0012605 | 0.00148964 | 3 |
| 150-350 | 150  | N    | -0.0013912 | 0.0020363  | 3 |
| 150-350 | 150  | N    | 0.00135117 | 0.00250082 | 3 |
| 150-350 | 150  | 150  | 0.05466472 | 0.01972575 | 3 |
| 150-350 | 150  | 150  | 0.02050017 | 0.06889748 | 3 |
| N       | N    | N    | 0.0004307  | 0.00016974 | 3 |
| N       | N    | N    | 0.00176884 | 0.00016337 | 3 |
| 150     | N    | N    | 0          | 0.00017592 | 3 |
| 150     | N    | N    | 0.00156888 | 0.00017593 | 3 |
| N       | N    | N    | 0.00011075 | 0.00011894 | 3 |
| N       | N    | N    | 0          | 9.71E-05   | 3 |
| 150     | N    | N    | 0.00038155 | 0.00015905 | 3 |
| 150     | N    | N    | 0.00028721 | 0.00015905 | 3 |
